# Supplementary material for: Homology Modeling, Molecular Dynamics Simulation, and Prediction of Bovine TLR2 Heterodimerization
Source: MDPI journal article supplement (doi:10.3390/ijms25031496), 2024-01-25
Supplement: s1 [file s1]

Program: ERRAT2  
File: mouse\_TLR1.pdb  
Chain#:A  
Overall quality factor\*\*: 88.679

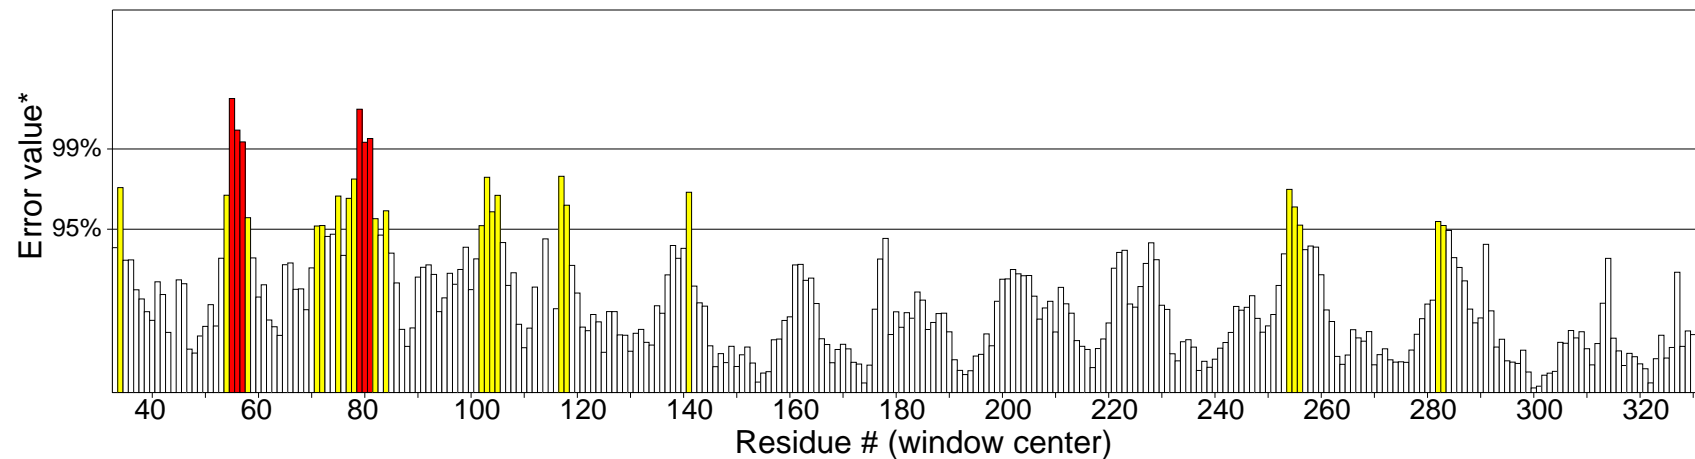

\*On the error axis, two lines are drawn to indicate the confidence with which it is possible to reject regions that exceed that error value.

\*\*Expressed as the percentage of the protein for which the calculated error value falls below the 95% rejection limit. Good high resolution structures generally produce values around 95% or higher. For lower resolutions (2.5 to 3Å) the average overall quality factor is around 91%.

Program: ERRAT2  
File: mouse\_TLR1.pdb  
Chain#:A  
Overall quality factor\*\*: 88.679

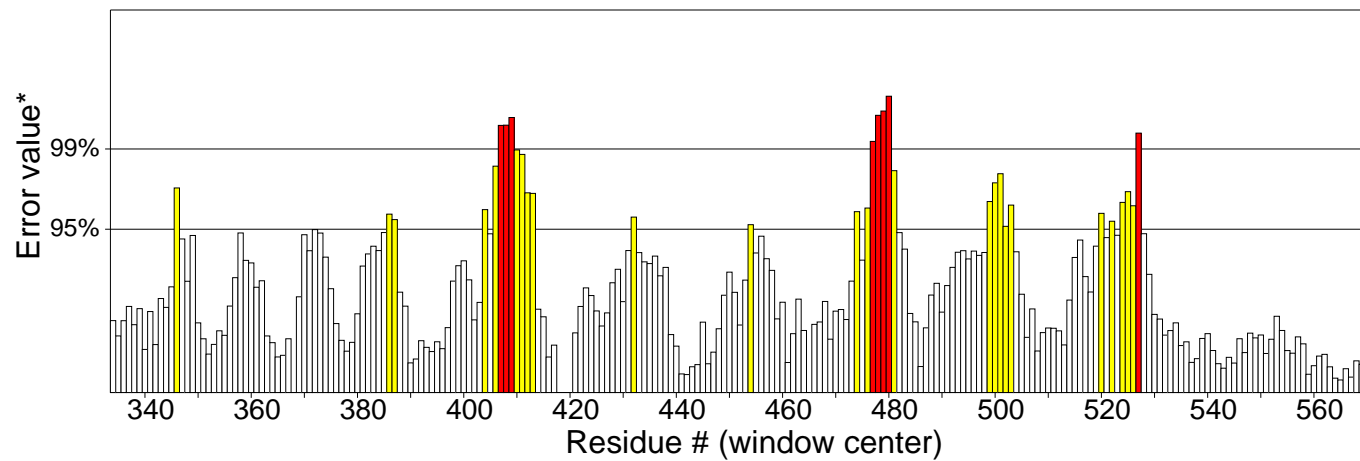

\*On the error axis, two lines are drawn to indicate the confidence with which it is possible to reject regions that exceed that error value.

\*\*Expressed as the percentage of the protein for which the calculated error value falls below the 95% rejection limit. Good high resolution structures generally produce values around 95% or higher. For lower resolutions (2.5 to 3Å) the average overall quality factor is around 91%.
